# Supplementary material for: Sizing gold nanoparticles using graphite furnace atomic absorption spectrometry
Source: Royal Society of Chemistry journal article supplement (doi:10.1039/c7ja00019g), 2017-01-01
Supplement: c7ja00019g1.pdf [file c7ja00019g1.pdf]

## Supporting Information to

### Sizing gold nanoparticles using graphite furnace atomic absorption spectrometry

Kerstin Leopold, Anja Brandt, Holly Tarren

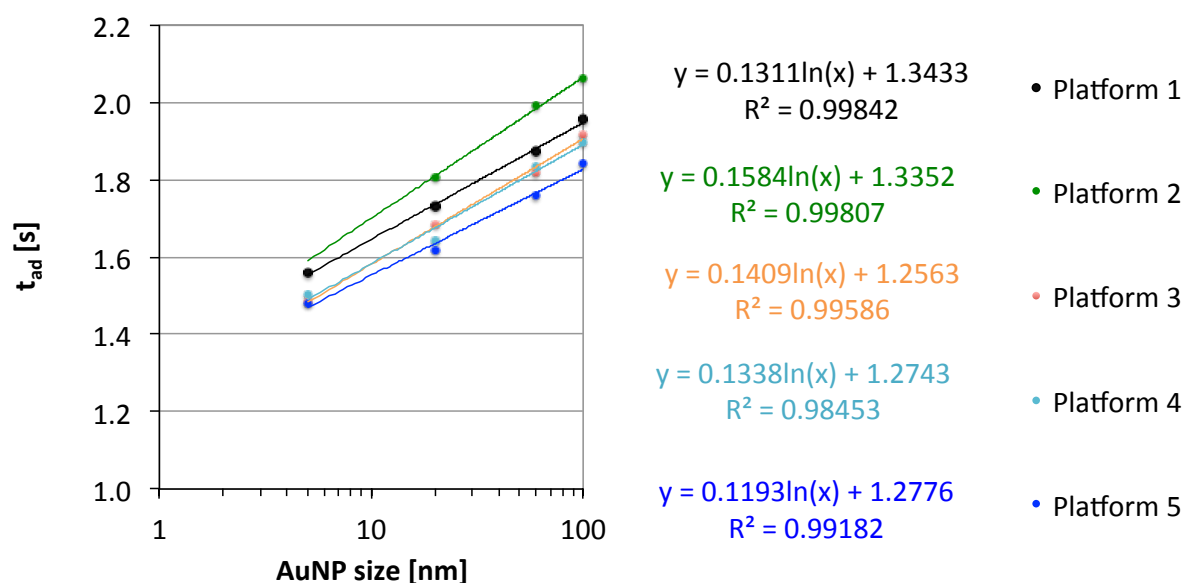

**Figure S1:** Obtained correlations of  $t_{ad}$  and AuNP size with different graphite platforms used as sample carrier.
